# Supplementary material for: Tuning the gallium content of metal precursors for Cu(In,Ga)Se2 thin film solar cells by electrodeposition from a deep eutectic solvent
Source: Royal Society of Chemistry journal article supplement (doi:10.1039/c3cp54509a), 2013-11-29
Supplement: c3cp54509a.pdf [file c3cp54509a.pdf]

## Tuning the Gallium Content of Metal Precursors for Cu(In,Ga)Se<sub>2</sub> Thin Film Solar Cells by Electrodeposition from a Deep Eutectic Solvent

João C. Malaquias<sup>1\*</sup>, David Regesch<sup>2</sup>, Phillip J. Dale<sup>1</sup>, Marc Steichen<sup>1</sup>

<sup>1</sup>University of Luxembourg, Laboratory for Energy Materials, 41, rue du Brill, L-4422  
Belvaux, Luxembourg.

<sup>2</sup>University of Luxembourg, Laboratory for Photovoltaics, 41, rue du Brill, L-4422  
Belvaux, Luxembourg.

(1) We present the mathematical development that via the mass fluxes ( $J$ ), the Ga/III ratio of the deposits can be controlled.

According to Fick's Law, during codeposition of two elements, in a system under diffusion control, the composition of a deposit is dictated by the ratio of the mass fluxes,  $J$ . Therefore, for In and Ga one can write:

$$\frac{J_{Ga}}{J_{In}} = \left( \frac{n_{Ga}}{n_{In}} \right)_{deposit} \quad (1)$$

a) Considering  $J_{Ga}/J_{In} = A$  one can prove that:

$$\frac{Ga}{Ga+In} = \frac{Ga}{III} = \frac{A}{A+1} \quad (2)$$

This equation establishes a relation between the mass fluxes and the expected Ga/III ratio, thus evidencing, theoretically, that via the mass fluxes one can control this ratio. The next steps will focus on proving that the charge passed during deposition,  $Q$ , ensures the desired stoichiometry.

When performing electrodeposition of two different species, the total current flowing,  $j_t$ , is the sum of the individual currents. Thus, in our system the currents generated by the reduction of In and Ga during deposition:

$$j_t = j_{In} + j_{Ga} \quad (3)$$

b) Therefore, by integration in time, one obtains the charge,  $Q$ :

$$Q_t = \int_0^t j_{In} dt + \int_0^t j_{Ga} dt \quad (4)$$

Since the deposition is performed under a diffusion control regime and the working electrode is rotated, any time dependent behaviour of the current is eliminated and one can directly write:

$$Q_t = Q_{In} + Q_{Ga} \quad (5)$$

c) Using Faraday's Law, one can write explicitly both components of  $Q_t$ .

$$Q_{In} = \frac{kFn_{In}}{\eta} \quad (6)$$

$$Q_{Ga} = \frac{kFn_{Ga}}{\eta} \quad (7)$$

Where  $k$  is the number of transferred electrons,  $F$  is the Faraday constant (96485 C.mol<sup>-1</sup>),  $n$  is the number of moles deposited (mol) and  $\eta$  is the plating efficiency. The latter variable will be considered 90% for both species.

d) One can then write:

$$Q_{Ga} = Q_{In} \cdot \frac{n_{Ga}}{n_{In}} \Leftrightarrow Q_{Ga} = Q_{In} \cdot \frac{J_{Ga}}{J_{In}} \quad (8)$$

$$Q_t = Q_{In} \left( 1 + \frac{J_{Ga}}{J_{In}} \right) \quad (9)$$

Equation 9 shows the total charge passed during deposition will be divided into 2 components, where the latter is related to Ga and includes a correction term  $J_{Ga}/J_{In}$  which ensures the expected stoichiometry of the deposit.

(2)

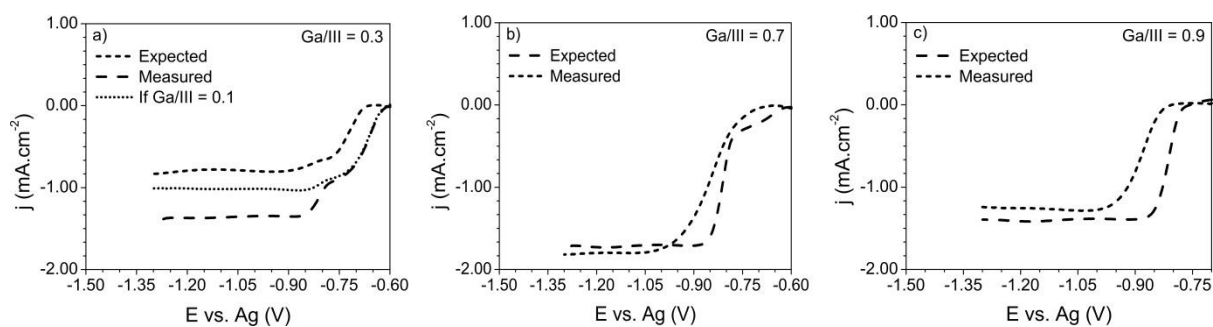

Expected and measured CVs of  $\text{ChCl:U-GaCl}_3\text{-InCl}_3$  on a Mo electrode with  $\text{Ga/III} =$  a) 0.3, b) 0.7 and c) 0.9. The expected CVs were calculated from the sum of the single element systems  $\text{ChCl:U-GaCl}_3$  and  $\text{ChCl:U-InCl}_3$  on a Mo electrode. All CVs were baseline corrected.
